# Supplementary material for: Effect of colloidal particle size on physicochemical properties and aggregation behaviors of two alkaline soils
Source: Copernicus journal article supplement (doi:10.5194/egusphere-2024-1266), 2024-06-11
Supplement: Supplementary file 1 [file egusphere-2024-1266-supplement.pdf]

Title page

**Effect of colloidal particle size on physicochemical properties and aggregation behaviors of two alkaline soils**

Yu-yang Yan<sup>1</sup>, Xin-ran Zhang<sup>1</sup>, Chen-yang Xu<sup>1,2\*</sup>, Jun-jun Liu<sup>1</sup>, Fei-nan Hu<sup>3,4</sup>, Zeng-chao Geng<sup>1,2</sup>

*(1. College of Natural Resources and Environment, Northwest A&F University, Yangling, Shaanxi 712100, China; 2. Key Laboratory of Plant Nutrition and the Agri-environment in Northwest China, Ministry of Agriculture, Northwest A&F University, Yangling, Shaanxi 712100, China; 3. State Key Laboratory of Soil Erosion and Dryland Farming on the Loess Plateau, Northwest A&F University, Yangling, Shaanxi 712100, China; 4. Institute of Soil and Water Conservation, Chinese Academy of Sciences, Ministry of Water Resources, Yangling, Shaanxi 712100, China)*

**\*Corresponding author:**

Chen-yang Xu

Email address: xuchenyang@nwafu.edu.cn, xuchenyang.ms@163.com;

Postal address: College of Natural Resources and Environment, Northwest A&F University, No. 3 Taicheng Road, Yangling District, Shaanxi 712100, China.

**Table S1** Centrifugation time and speed for extraction of soil colloidal particles

| Particle diameter    | Centrifugation speed (r·min <sup>-1</sup> ) | Centrifugation time (min) |
|----------------------|---------------------------------------------|---------------------------|
| $d < 2 \mu\text{m}$  | 600                                         | 6.28                      |
| $d < 1 \mu\text{m}$  | 1200                                        | 6.28                      |
| $d < 100 \text{ nm}$ | 9500                                        | 10.03                     |

**Table S2** The oxygen functions of Lou soil and cinnamon soil colloids

| Soil colloids          | Particle diameter    | Contents of carbon-containing organic functional groups (%) |       |       |       | Photoelectron spectra peak area of organic functional groups containing carbon (XPS, eV) |       |       |       |
|------------------------|----------------------|-------------------------------------------------------------|-------|-------|-------|------------------------------------------------------------------------------------------|-------|-------|-------|
|                        |                      | C–C                                                         | C–H   | C–O   | C=O   | COO-                                                                                     | C–C   | C–H   | C–O   |
| Lou soil colloids      | $d < 2 \mu\text{m}$  | 67.99                                                       | 21.06 | 0     | 10.95 | 51785                                                                                    | 16160 | 0     | 8398  |
|                        | $d < 1 \mu\text{m}$  | 77.80                                                       | 13.00 | 2.65  | 6.55  | 57865                                                                                    | 9668  | 1968  | 4880  |
|                        | $d < 100 \text{ nm}$ | 79.07                                                       | 2.11  | 18.82 | 0     | 128893                                                                                   | 3433  | 30595 | 0     |
| cinnamon soil colloids | $d < 2 \mu\text{m}$  | 94.75                                                       | 0     | 0     | 5.25  | 96519                                                                                    | 0     | 0     | 5335  |
|                        | $d < 1 \mu\text{m}$  | 95.09                                                       | 0     | 2.84  | 2.07  | 90071                                                                                    | 0     | 2687  | 1945  |
|                        | $d < 100 \text{ nm}$ | 79.80                                                       | 10.67 | 0     | 9.53  | 117936                                                                                   | 15743 | 0     | 14043 |

**Table S3** The concentrations of soluble cations in soil colloidal suspension

| Soil colloids          | Particle diameter  | K <sup>+</sup><br>(mmol·L <sup>-1</sup> ) | Na <sup>+</sup><br>(mmol·L <sup>-1</sup> ) | Ca <sup>2+</sup><br>(mmol·L <sup>-1</sup> ) | Mg <sup>2+</sup><br>(mmol·L <sup>-1</sup> ) |
|------------------------|--------------------|-------------------------------------------|--------------------------------------------|---------------------------------------------|---------------------------------------------|
| Lou soil colloids      | $< 2 \mu\text{m}$  | 0.110                                     | 0.149                                      | 0.106                                       | 0.030                                       |
|                        | $< 1 \mu\text{m}$  | 0.103                                     | 0.185                                      | 0.054                                       | 0.010                                       |
|                        | $< 100 \text{ nm}$ | 0.079                                     | 0.045                                      | 0.060                                       | 0.010                                       |
| cinnamon soil colloids | $< 2 \mu\text{m}$  | 0.091                                     | 0.110                                      | 0.183                                       | 0.027                                       |
|                        | $< 1 \mu\text{m}$  | 0.084                                     | 0.157                                      | 0.079                                       | 0.006                                       |
|                        | $< 100 \text{ nm}$ | 0.081                                     | 0.107                                      | 0.090                                       | 0.005                                       |

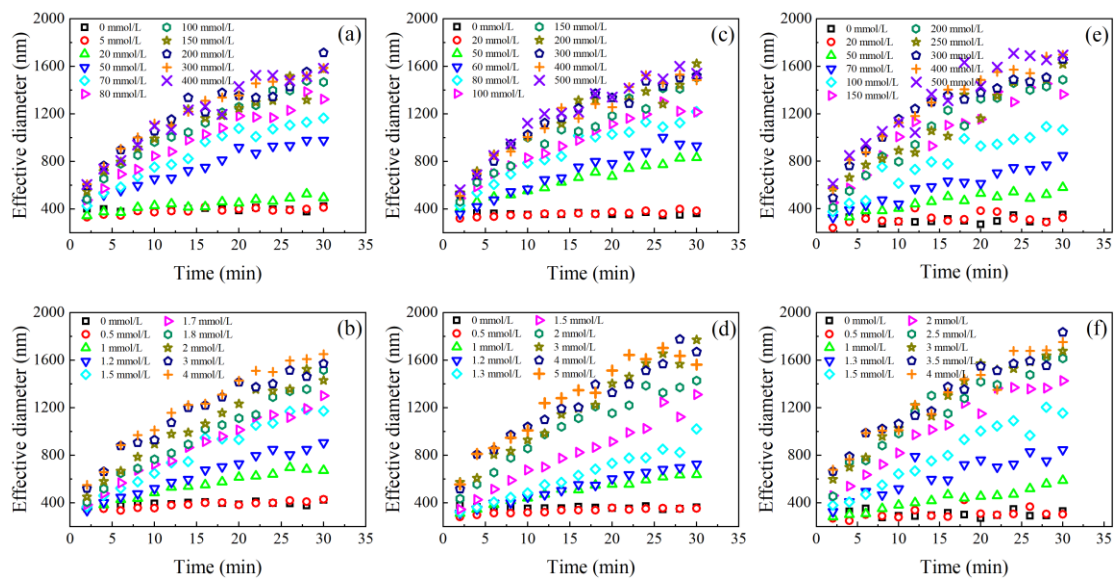

**Fig. S1** The aggregation kinetic curves of Lou soil colloids in NaCl and CaCl<sub>2</sub> solutions, (a).  $d < 2 \mu\text{m}$  in NaCl, (b).  $d < 2 \mu\text{m}$  in CaCl<sub>2</sub>, (c).  $d < 1 \mu\text{m}$  in NaCl, (d).  $d < 1 \mu\text{m}$  in CaCl<sub>2</sub>, (e).  $d < 100 \text{ nm}$  in NaCl, (f).  $d < 100 \text{ nm}$  in CaCl<sub>2</sub>.

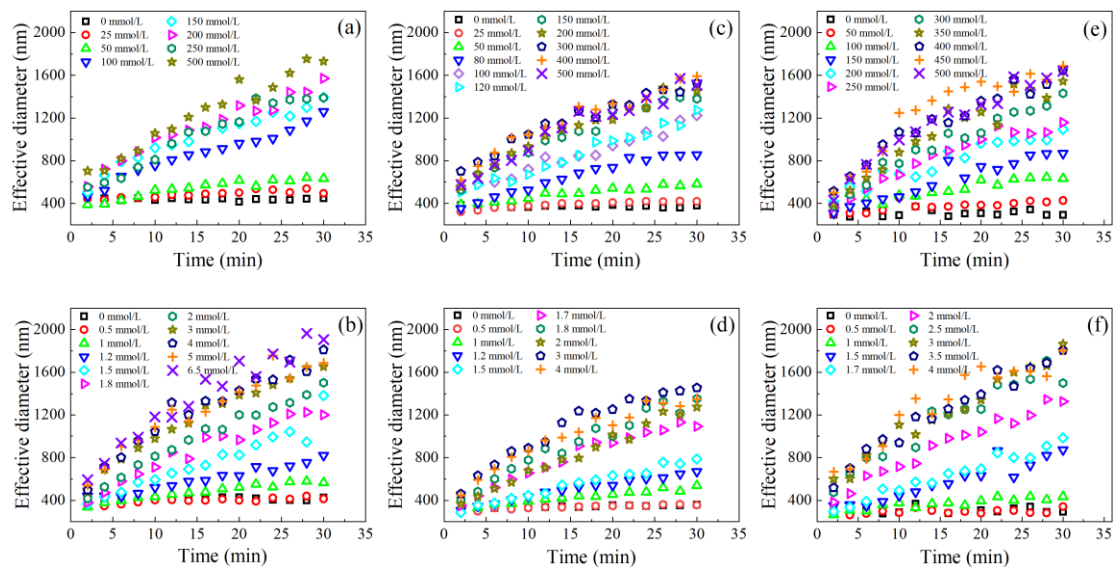

**Fig. S2** The aggregation kinetic curves of cinnamon soil colloids in NaCl and CaCl<sub>2</sub> solutions, (a).  $d < 2 \mu\text{m}$  in NaCl, (b).  $d < 2 \mu\text{m}$  in CaCl<sub>2</sub>, (c).  $d < 1 \mu\text{m}$  in NaCl, (d).  $d < 1 \mu\text{m}$  in CaCl<sub>2</sub>, (e).  $d < 100 \text{ nm}$  in NaCl, (f).  $d < 100 \text{ nm}$  in CaCl<sub>2</sub>.
